# Supplementary material
Source: publisher figshare collection journal article supplement (https://springernature.figshare.com/ndownloader/files/31577453)
Supplement: Supplementary file [file 31577453]

#### Additional file 4

Sonographically assessable pathologies mentioned in patients' medical records

|                                                                                                                                                   |                        |                    |                            |                    |
|---------------------------------------------------------------------------------------------------------------------------------------------------|------------------------|--------------------|----------------------------|--------------------|
| <b>Were sonographically assessable pathologies mentioned in the patient's medical record?</b>                                                     | yes                    | 72 (n)<br>64.9 (%) | no                         | 39 (n)<br>35.1 (%) |
| <b>Did routine WBU confirm the mentioned pathologies or were they at least plausible?</b>                                                         | confirmed or plausible | 60 (n)<br>83.3 (%) | unconfirmed or implausible | 12 (n)<br>16.7 (%) |
| <b>Were additional pathologies detected in patients who had at least one sonographic assessable pathology mentioned in their medical records?</b> | yes                    | 67 (n)<br>93.1 (%) | no                         | 5 (n)<br>6.9 (%)   |
